# Supplementary material for: Association of nutraceutical supplements with longer telomere length
Source: PubMed Central journal article supplement — Int J Mol Med. 2019 May 10;44(1):218–26. doi: 10.3892/ijmm.2019.4191 (PMC6559326; doi:10.3892/ijmm.2019.4191), 2019-05-10
Supplement: Supplementary_Data.pdf [file Supplementary_Data.pdf]

**Table S1. Descriptive statistics of the whole TL and short TL among the age groups.**

|     |              | Age groups |       |        |       |        |       |                      |
|-----|--------------|------------|-------|--------|-------|--------|-------|----------------------|
|     |              | 40-50      |       | 45-50  |       | 50-55  |       |                      |
|     |              | Mean       | SD    | Mean   | SD    | Mean   | SD    | P-value <sup>a</sup> |
| TL  |              |            |       |        |       |        |       |                      |
|     | 1st Quartile | 8,642      | 1,507 | 8,548  | 1,290 | 8,498  | 1,276 | 0,964                |
|     | Median       | 10,429     | 1,566 | 10,220 | 1,423 | 10,361 | 1,346 | 0,908                |
|     | 3rd Quartile | 12,415     | 1,860 | 12,088 | 1,763 | 12,811 | 1,410 | 0,537                |
| TLS |              |            |       |        |       |        |       |                      |
|     | 1st Quartile | 6,525      | 1,333 | 6,462  | 1,075 | 6,161  | 1,281 | 0,741                |
|     | Median       | 7,238      | 1,382 | 7,184  | 1,155 | 6,937  | 1,206 | 0,826                |
|     | 3rd Quartile | 7,778      | 1,445 | 7,698  | 1,235 | 7,547  | 1,251 | 0,912                |

<sup>a</sup>P-values were derived from multiple linear regression of TL/TLS quartiles following adjustment of sex and supplements use.
